# Supplementary material for: Inhibitory Effect of Metalloproteinase Inhibitors on Skin Cell Inflammation Induced by Jellyfish Nemopilema nomurai Nematocyst Venom
Source: PubMed Central journal article supplement (PMC6468808; doi:10.3390/toxins11030156), 2019-03-10
Supplement: toxins-11-00156-s001.pdf [file toxins-11-00156-s001.pdf]

# Supplementary Materials: Inhibitory Effect of Metalloproteinase Inhibitors on Skin Cells Inflammation Induced by Jellyfish *Nemopilema nomurai* (*N. nomurai*) Nematocyst Venom

Aoyu Li, Huahua Yu, Rongfeng Li, Song Liu, Ronge Xing and Pengcheng Li

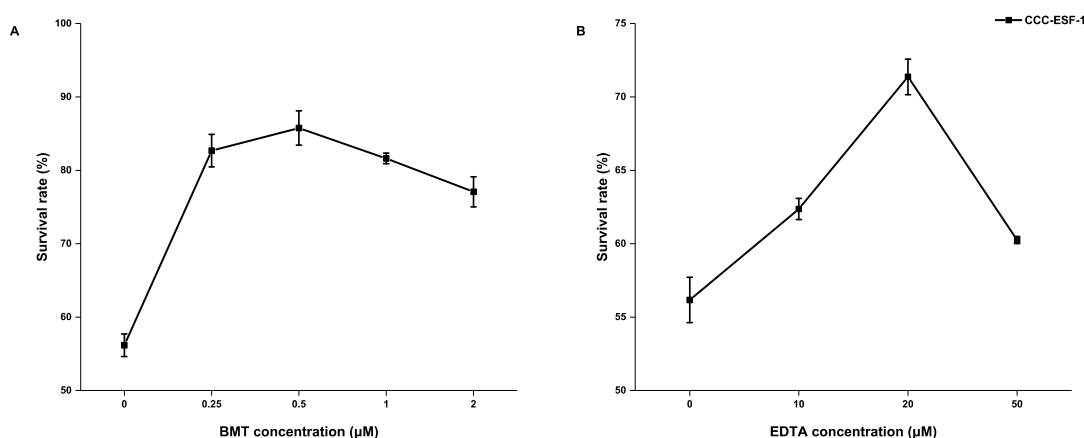

**Figure S1.** Effects of different concentrations of BMT and EDTA on cell viability. **(A)** CCC-ESF-1 cells were treated with different concentrations of BMT. **(B)** CCC-ESF-1 cells were treated with different concentrations of EDTA.
